# Supplementary material for: The gastrointestinal microbiome of browsing goats (Capra hircus)
Source: PubMed Central journal article supplement (PMC9576075; doi:10.1371/journal.pone.0276262), 2022-10-17
Supplement: pone.0276262.s007.pdf [file pone.0276262.s007.pdf]

**S1 Table** Overall average dissimilarity (in percentage) between the bacterial communities present in the *Capra hircus* GITs.

| %         | <b>Ru</b>   | <b>OA</b>   | <b>Je</b>   | <b>Ce</b> | <b>Co</b> |
|-----------|-------------|-------------|-------------|-----------|-----------|
| <b>Ru</b> |             |             |             |           |           |
| <b>OA</b> | 30.3        |             |             |           |           |
| <b>Je</b> | <b>78.3</b> | <b>78.8</b> |             |           |           |
| <b>Ce</b> | 68.2        | 68.0        | <b>86.0</b> |           |           |
| <b>Co</b> | 65.4        | 65.4        | <b>85.4</b> | 28.3      |           |

Ru: rumen; OA: omasum + abomasum; Je: jejunum; Ce: cecum; Co: colon. Bold indicates the highest average dissimilarity between the GIT sections.
