# Supplementary material for: The gastrointestinal microbiome of browsing goats (Capra hircus)
Source: PubMed Central journal article supplement (PMC9576075; doi:10.1371/journal.pone.0276262), 2022-10-17
Supplement: pone.0276262.s008.pdf [file pone.0276262.s008.pdf]

**S2Table** Similarity percentages (SIMPER) analysis between the stomachs/jejuna and large intestine/jejuna the bacterial communities in the *Capra hircus* GITs.

| <b>Ru/Je</b>                |            |                     |                   |                |                |
|-----------------------------|------------|---------------------|-------------------|----------------|----------------|
| <b>Taxon</b>                | <b>Avg</b> | <b>Contrib. (%)</b> | <b>Cumul. (%)</b> | <b>Mean Ru</b> | <b>Mean Je</b> |
| Romboutsia                  | 12.3       | <b>15.7</b>         | 15.7              | 0.0            | 24.6           |
| Prevotella                  | 11.3       | <b>14.4</b>         | 30.2              | 23.0           | 0.4            |
| WCHB1-41_ge                 | 5.7        | 7.3                 | 37.4              | 1.7            | 13.1           |
| Rikenellaceae_RC9_gut_group | 3.9        | 5.0                 | 42.4              | 7.9            | 0.0            |
| <b>OA/Je</b>                |            |                     |                   |                |                |
| <b>Taxon</b>                | <b>Avg</b> | <b>Contrib. (%)</b> | <b>Cumul. (%)</b> | <b>Mean OA</b> | <b>Mean Je</b> |
| Romboutsia                  | 12.3       | <b>15.6</b>         | 15.6              | 0.0            | 24.6           |
| Prevotella                  | 10.5       | <b>13.3</b>         | 29.0              | 21.4           | 0.4            |
| WCHB1-41_ge                 | 5.7        | 7.3                 | 36.2              | 1.7            | 13.1           |
| Rikenellaceae_RC9_gut_group | 3.9        | 5.0                 | 41.2              | 7.9            | 0.0            |
| <b>Ce/Je</b>                |            |                     |                   |                |                |
| <b>Taxon</b>                | <b>Avg</b> | <b>Contrib. (%)</b> | <b>Cumul. (%)</b> | <b>Mean Ce</b> | <b>Mean Je</b> |
| Romboutsia                  | 12.1       | <b>14.1</b>         | 14.1              | 0.4            | 24.6           |
| WCHB1-41_ge                 | 6.3        | <b>7.3</b>          | 21.4              | 0.6            | 13.1           |
| Rikenellaceae_RC9_gut_group | 4.0        | 4.7                 | 26.1              | 8.1            | 0.0            |
| Bacteroides                 | 4.0        | 4.7                 | 30.7              | 8.1            | 0.0            |
| <b>Co/Je</b>                |            |                     |                   |                |                |
| <b>Taxon</b>                | <b>Avg</b> | <b>Contrib. (%)</b> | <b>Cumul. (%)</b> | <b>Mean Co</b> | <b>Mean Je</b> |
| Romboutsia                  | 12.3       | <b>14.4</b>         | 14.4              | 0.1            | 24.6           |
| WCHB1-41_ge                 | 6.4        | <b>7.5</b>          | 21.8              | 0.3            | 13.1           |
| Rikenellaceae_RC9_gut_group | 4.3        | 5.0                 | 26.9              | 8.6            | 0.0            |
| Bacteroides                 | 3.6        | 4.3                 | 31.1              | 7.3            | 0.0            |
| <b>Ru/Ce</b>                |            |                     |                   |                |                |
| <b>Taxon</b>                | <b>Avg</b> | <b>Contrib. (%)</b> | <b>Cumul. (%)</b> | <b>Mean Ru</b> | <b>Mean Ce</b> |
| Prevotella                  | 11.0       | <b>16.2</b>         | 16.2              | 23.0           | 1.0            |
| Bacteroides                 | 4.0        | <b>5.9</b>          | 22.1              | 0.0            | 8.1            |

|            |     |     |      |     |     |
|------------|-----|-----|------|-----|-----|
| UCG-010_ge | 3.1 | 4.5 | 26.6 | 1.5 | 7.7 |
| UCG-005    | 2.7 | 4.0 | 30.6 | 0.6 | 6.1 |

---

**Ru/Co**

| <b>Taxon</b> | <b>Avg</b> | <b>Contrib. (%)</b> | <b>Cumul. (%)</b> | <b>Mean Ru</b> | <b>Mean Co</b> |
|--------------|------------|---------------------|-------------------|----------------|----------------|
| Prevotella   | 11.0       | <b>16.8</b>         | 16.8              | 23.0           | 1.0            |
| Bacteroides  | 3.7        | <b>5.6</b>          | 22.4              | 0.0            | 7.3            |
| Alistipes    | 3.0        | 4.5                 | 26.9              | 0.0            | 5.9            |
| UCG-005      | 2.2        | 3.4                 | 30.3              | 0.6            | 5.1            |

---

**OA/Ce**

| <b>Taxon</b> | <b>Avg</b> | <b>Contrib. (%)</b> | <b>Cumul. (%)</b> | <b>Mean AO</b> | <b>Mean Ce</b> |
|--------------|------------|---------------------|-------------------|----------------|----------------|
| Prevotella   | 10.2       | <b>15.0</b>         | 15.0              | 21.4           | 1.0            |
| Bacteroides  | 4.0        | <b>5.9</b>          | 20.9              | 0.0            | 8.1            |
| UCG-010_ge   | 3.1        | 4.6                 | 25.5              | 1.4            | 7.7            |
| Alistipes    | 2.5        | 3.7                 | 29.3              | 0.0            | 5.1            |

---

**OA/Co**

| <b>Taxon</b>      | <b>Avg</b> | <b>Contrib. (%)</b> | <b>Cumul. (%)</b> | <b>Mean AO</b> | <b>Mean Co</b> |
|-------------------|------------|---------------------|-------------------|----------------|----------------|
| Prevotella        | 10.2       | <b>15.6</b>         | 15.6              | 21.4           | 1.0            |
| Bacteroides       | 3.7        | <b>5.6</b>          | 21.2              | 0.0            | 7.3            |
| Alistipes         | 3.0        | 4.5                 | 25.7              | 0.0            | 5.9            |
| Muribaculaceae_ge | 2.5        | 3.8                 | 29.5              | 5.1            | 0.1            |

Avg: average dissimilarity; Contrib. (%): percent contributed; Cumul. (%): cumulative percentage; Ru: rumen; OA: omasum + abomasum; Je: jejunum; Ce: cecum; Co: colon. Bold indicates the relative percentage of the bacterial genera that contributed most to the observed dissimilarity between samples.
