# Supplementary material for: The gastrointestinal microbiome of browsing goats (Capra hircus)
Source: PubMed Central journal article supplement (PMC9576075; doi:10.1371/journal.pone.0276262), 2022-10-17
Supplement: pone.0276262.s009.pdf [file pone.0276262.s009.pdf]

**Table S3.** Sequence based classification of Glycoside Hydrolases (GHs) predicted through 16S gene sequences by PICRUST2 in the bacterial communities of *Capra hircus* GITs.

| EC number     | Enzyme                                                       | Families                    |
|---------------|--------------------------------------------------------------|-----------------------------|
| EC:2.4.1.10   | Levansucrase                                                 | 32,68                       |
| EC:2.4.1.161  | Oligosaccharide 4-alpha-D-glucosyltransferase                | 31                          |
| EC:2.4.1.18   | 1,4-alpha-glucan branching enzyme                            | 13,57                       |
| EC:2.4.1.20*  | Cellobiose phosphorylase                                     | 94                          |
| EC:2.4.1.211  | 1,3-beta-galactosyl-N-acetylhexosamine phosphorylase         | 112                         |
| EC:2.4.1.230  | Kojibiose phosphorylase                                      | 65                          |
| EC:2.4.1.247  | Beta-D-galactosyl-(1->4)-L-rhamnose phosphorylase            | 112                         |
| EC:2.4.1.25   | 4-alpha-glucanotransferase                                   | 13,57,77                    |
| EC:2.4.1.279  | Nigerose phosphorylase                                       | 65                          |
| EC:2.4.1.280  | N,N'-diacetylchitobiose phosphorylase                        | 94                          |
| EC:2.4.1.281  | 4-O-beta-D-mannosyl-D-glucose phosphorylase                  | 130                         |
| EC:2.4.1.319  | Beta-1,4-mannooligosaccharide phosphorylase                  | 130                         |
| EC:2.4.1.320  | 1,4-beta-mannosyl-N-acetylglucosamine phosphorylase          | 130                         |
| EC:2.4.1.321  | Cellobionic acid phosphorylase                               | 94                          |
| EC:2.4.1.4    | Amylosucrase                                                 | 13                          |
| EC:2.4.1.5    | Dextranucrase                                                | 70                          |
| EC:2.4.1.64   | Alpha,alpha-trehalose phosphorylase                          | 65                          |
| EC:2.4.1.7    | Sucrose phosphorylase                                        | 13                          |
| EC:2.4.1.8    | Maltose phosphorylase                                        | 65                          |
| EC:3.1.1.73*  | Feruloyl esterase                                            | 10,62,78                    |
| EC:3.2.1.1    | Alpha-amylase                                                | 13,57,126                   |
| EC:3.2.1.10   | Oligo-1,6-glucosidase                                        | 13,31                       |
| EC:3.2.1.11   | Dextranase                                                   | 31,49,66                    |
| EC:3.2.1.113  | Mannosyl-oligosaccharide 1,2-alpha-mannosidase               | 38,47,92                    |
| EC:3.2.1.122  | Maltose-6'-phosphate glucosidase                             | 4                           |
| EC:3.2.1.123  | Endoglycosylceramidase                                       | 5                           |
| EC:3.2.1.130  | Glycoprotein endo-alpha-1,2-mannosidase                      | 99                          |
| EC:3.2.1.132  | Chitosanase                                                  | 3,5,8,46,75,80              |
| EC:3.2.1.135  | Neopullulanase                                               | 13                          |
| EC:3.2.1.136  | Glucuronoarabinoxylan endo-1,4-beta-xylanase                 | 30                          |
| EC:3.2.1.139* | Alpha-glucuronidase                                          | 67                          |
| EC:3.2.1.14   | Chitinase                                                    | 18,19,23                    |
| EC:3.2.1.141  | 4-alpha-D-((1->4)-alpha-D-glucano)trehalose trehalohydrolase | 13                          |
| EC:3.2.1.156  | Oligosaccharide reducing-end xylanase                        | 8,1                         |
| EC:3.2.1.165  | Exo-1,4-beta-D-glucosaminidase                               | 2,9,35                      |
| EC:3.2.1.17   | Lysozyme                                                     | 18,19,22,23,24,25,73,108,NC |
| EC:3.2.1.170  | Mannosylglycerate hydrolase                                  | 63                          |
| EC:3.2.1.172  | Unsaturated rhamnogalacturonyl hydrolase                     | 105                         |
| EC:3.2.1.177  | Alpha-D-xyloside xylohydrolase                               | 31                          |
| EC:3.2.1.18   | Exo-alpha-sialidase                                          | 33,34,83,156,NC             |

|              |                                                                             |                                                  |
|--------------|-----------------------------------------------------------------------------|--------------------------------------------------|
| EC:3.2.1.180 | Unsaturated chondroitin disaccharide hydrolase                              | 88                                               |
| EC:3.2.1.185 | Non-reducing end beta-L-arabinofuranosidase                                 | 127,142,143,146                                  |
| EC:3.2.1.187 | (Ara-f)(3)-Hyp beta-L-arabinobiosidase                                      | 121                                              |
| EC:3.2.1.20* | Alpha-glucosidase                                                           | 4,13,31,76,97,122                                |
| EC:3.2.1.21* | Beta-glucosidase                                                            | 1,2,3,5,16,30,39,116,<br>131,NC                  |
| EC:3.2.1.22* | Alpha-galactosidase                                                         | 4,27,31,36,57,97,110                             |
| EC:3.2.1.23  | Beta-galactosidase                                                          | 1,2,3,5,16,35,42,50,54,<br>147,165,173,NC        |
| EC:3.2.1.24  | Alpha-mannosidase                                                           | 38,92                                            |
| EC:3.2.1.25* | Beta-mannosidase                                                            | 1,2,5,113,164                                    |
| EC:3.2.1.26  | Beta-fructofuranosidase                                                     | 32,68,100                                        |
| EC:3.2.1.28  | Alpha,alpha-trehalase                                                       | 13,15,37,65                                      |
| EC:3.2.1.3   | Glucan 1,4-alpha-glucosidase                                                | 15,97                                            |
| EC:3.2.1.31  | Beta-glucuronidase                                                          | 1,2,3,79,137                                     |
| EC:3.2.1.35  | Hyaluronoglucosaminidase                                                    | 16,56,84                                         |
| EC:3.2.1.37* | Xylan 1,4-beta-xylosidase                                                   | 1,2,3,5,10,30,39,43,52,<br>54,120                |
| EC:3.2.1.4*  | Cellulase (or endo- $\beta$ -1,4-glucanase)                                 | 5,6,7,8,9,10,12,26,44,<br>45,48,51,74,124,148,NC |
| EC:3.2.1.40  | Alpha-L-rhamnosidase                                                        | 33,78,106                                        |
| EC:3.2.1.41  | Pullulanase                                                                 | 13,57                                            |
| EC:3.2.1.45  | Glucosylceramidase                                                          | 3,5,116                                          |
| EC:3.2.1.50  | Alpha-N-acetylglucosaminidase                                               | 89                                               |
| EC:3.2.1.51  | Alpha-L-fucosidase                                                          | 29,95,151,NC                                     |
| EC:3.2.1.52  | Beta-N-acetylhexosaminidase                                                 | 2,3,18,20,84                                     |
| EC:3.2.1.55* | Non-reducing end alpha-L-arabinofuranosidase                                | 2,3,10,39,43,51,54,62                            |
| EC:3.2.1.58  | Glucan 1,3-beta-glucosidase                                                 | 5,16,55                                          |
| EC:3.2.1.64  | 2,6-beta-fructan 6-levanbiohydrolase                                        | 32                                               |
| EC:3.2.1.65  | Levanase                                                                    | 32                                               |
| EC:3.2.1.68  | Isoamylase                                                                  | 13                                               |
| EC:3.2.1.70  | Glucan 1,6-alpha-glucosidase                                                | 13,15                                            |
| EC:3.2.1.73  | Licheninase                                                                 | 5,8,9,11,12,16,17,<br>26,NC                      |
| EC:3.2.1.78* | Mannan endo-1,4-beta-mannosidase                                            | 5,26,44,45,113,134                               |
| EC:3.2.1.8*  | Endo-1,4-beta-xylanase                                                      | 3,5,6,8,10,11,26,30,<br>43,98                    |
| EC:3.2.1.80  | Fructan beta-fructosidase                                                   | 32                                               |
| EC:3.2.1.81  | Beta-agarase                                                                | 16,50,86,118                                     |
| EC:3.2.1.82  | Exo-poly-alpha-galacturonosidase                                            | 28                                               |
| EC:3.2.1.85  | 6-phospho-beta-galactosidase                                                | 1                                                |
| EC:3.2.1.86  | 6-phospho-beta-glucosidase                                                  | 1,4                                              |
| EC:3.2.1.89* | Arabinogalactan endo-beta-1,4-galactanase                                   | 53,147                                           |
| EC:3.2.1.91* | Cellulose 1,4-beta-cellobiosidase (non-reducing end) (or cellobiohydrolase) | 5,6,9,51                                         |
| EC:3.2.1.93  | Alpha,alpha-phosphotrehalase                                                | 13                                               |
| EC:3.2.1.96  | Mannosyl-glycoprotein endo-beta-N-acetylglucosaminidase                     | 18,20,73,85                                      |
| EC:3.2.1.97  | Endo-alpha-N-acetylgalactosaminidase                                        | 101                                              |
| EC:3.2.1.99* | Arabinan endo-1,5-alpha-L-arabinosidase                                     | 43                                               |

|              |                                                |    |
|--------------|------------------------------------------------|----|
| EC:3.5.2.17  | Hydroxyisourate hydrolase                      | 1  |
| EC:4.2.2.17  | Inulin fructotransferase (DFA-I-forming)       | 91 |
| EC:5.4.99.15 | (1->4)-alpha-D-glucan 1-alpha-D-glucosylmutase | 13 |
| EC:5.4.99.16 | Maltose alpha-D-glucosyltransferase            | 13 |

---

Not Classified (N.C.). \*Enzymes reported among the main to be involved in the direct degradation of lignocellulose [73,92]

## References

73. Saini A, Aggarwal NK, Sharma A, Yadav A. Actinomycetes: A source of lignocellulolytic enzymes. *Enzyme Res.* 2015;2015:1–15. doi: 10.1155/2015/279381
92. Sweeney MD, Xu F. Biomass converting enzymes as industrial biocatalysts for fuels and chemicals: recent developments. *Catalysts* . 2012;2(2):244–63. doi: 10.3390/catal2020244
