# Supplementary material for: The gastrointestinal microbiome of browsing goats (Capra hircus)
Source: PubMed Central journal article supplement (PMC9576075; doi:10.1371/journal.pone.0276262), 2022-10-17
Supplement: pone.0276262.s010.pdf [file pone.0276262.s010.pdf]

**S4 Table** Sequence based classification of carbohydrate active enzymes (CAE) predicted through 16S gene sequences by PICRUST2 in the archaeal communities of *Capra hircus* GITs.

| <b>EC number</b> | <b>Enzyme</b>                                               | <b>Classification</b> |     |
|------------------|-------------------------------------------------------------|-----------------------|-----|
| EC:2.4.1.1       | Glycogen phosphorylase                                      | GT                    |     |
| EC:2.4.1.15      | Alpha,alpha-trehalose-phosphate synthase (UDP-forming)      | GT                    |     |
| EC:2.4.1.227     | acetylglucosaminyltransferase                               | GT                    |     |
| EC:2.4.1.83      | Dolichyl-phosphate beta-D-mannosyltransferase               | GT                    |     |
| EC:2.4.99.18     | Dolichyl-diphosphooligosaccharide--protein glycotransferase | GT                    |     |
| EC:3.1.3.12      | Trehalose-phosphatase                                       | GT                    |     |
| EC:3.2.1.1       | Alpha-amylase                                               | GH                    | CBM |
| EC:3.2.1.4       | Cellulase                                                   | GH                    | CBM |

Glycoside Hydrolase (GH), Glycosyl transferase (GT), and Carbohydrate Binding Module (CBM).
