# Supplementary material for: The gastrointestinal microbiome of browsing goats (Capra hircus)
Source: PubMed Central journal article supplement (PMC9576075; doi:10.1371/journal.pone.0276262), 2022-10-17
Supplement: pone.0276262.s011.pdf [file pone.0276262.s011.pdf]

**S5 Table** Overall average dissimilarity (in percentage) between the archaeal communities present in the *Capra hircus* GITs.

| %         | <b>Ru</b>   | <b>OA</b>   | <b>Je</b>   | <b>Ce</b> | <b>Co</b> |
|-----------|-------------|-------------|-------------|-----------|-----------|
| <b>Ru</b> |             |             |             |           |           |
| <b>OA</b> | 1.0         |             |             |           |           |
| <b>Je</b> | 0.5         | 0.7         |             |           |           |
| <b>Ce</b> | <b>32.9</b> | <b>33.1</b> | <b>32.9</b> |           |           |
| <b>Co</b> | <b>33.5</b> | <b>33.6</b> | <b>33.5</b> | 24.8      |           |

Ru: rumen; OA: omasum + abomasum; Je: jejunum; Ce: cecum; Co: colon. Bold indicates the highest average dissimilarity between the GIT sections.
