# Supplementary material for: The gastrointestinal microbiome of browsing goats (Capra hircus)
Source: PubMed Central journal article supplement (PMC9576075; doi:10.1371/journal.pone.0276262), 2022-10-17
Supplement: pone.0276262.s012.pdf [file pone.0276262.s012.pdf]

**S6 Table** Similarity percentages (SIMPER) analysis between the large intestines/stomachs, large intestines/jejuna, omasum-abomasums/rumens (50.3%) and omasum-abomasums/jejuna archaeal communities in the *Capra hircus* GITs.

| <b>Ru/Ce</b>                           |            |                     |                   |                |                |
|----------------------------------------|------------|---------------------|-------------------|----------------|----------------|
| <b>Taxon</b>                           | <b>Avg</b> | <b>Contrib. (%)</b> | <b>Cumul. (%)</b> | <b>Mean Ru</b> | <b>Mean Ce</b> |
| Methanobrevibacter                     | 16.4       | <b>50.0</b>         | 50.0              | 99.8           | 66.9           |
| Methanocorpusculum                     | 16.3       | <b>49.5</b>         | 99.4              | 0.0            | 32.6           |
| Methanimicrococcus                     | 0.1        | 0.3                 | 99.7              | 0.0            | 0.2            |
| Methanosphaera                         | 0.1        | 0.3                 | 100.0             | 0.2            | 0.3            |
| Methanocorpusculaceae<br>_unclassified | 0.0        | 0.0                 | 100.0             | 0.0            | 0.0            |
| <b>Ru/Co</b>                           |            |                     |                   |                |                |
| <b>Taxon</b>                           | <b>Avg</b> | <b>Contrib. (%)</b> | <b>Cumul. (%)</b> | <b>Mean Ru</b> | <b>Mean Co</b> |
| Methanobrevibacter                     | 16.7       | <b>50.0</b>         | 50.0              | 99.8           | 66.3           |
| Methanocorpusculum                     | 16.5       | <b>49.2</b>         | 99.1              | 0.0            | 32.9           |
| Methanimicrococcus                     | 0.2        | 0.6                 | 99.7              | 0.0            | 0.4            |
| Methanosphaera                         | 0.1        | 0.2                 | 99.9              | 0.2            | 0.3            |
| Methanocorpusculaceae<br>_unclassified | 0.0        | 0.0                 | 100.0             | 0.0            | 0.0            |
| <b>OA/Ce</b>                           |            |                     |                   |                |                |
| <b>Taxon</b>                           | <b>Avg</b> | <b>Contrib. (%)</b> | <b>Cumul. (%)</b> | <b>Mean OA</b> | <b>Mean Ce</b> |
| Methanocorpusculum                     | 16.3       | <b>49.3</b>         | 49.3              | 0.0            | 32.6           |
| Methanobrevibacter                     | 16.2       | <b>49.0</b>         | 98.3              | 98.8           | 66.9           |
| Methanosphaera                         | 0.5        | 1.4                 | 99.7              | 1.2            | 0.3            |
| Methanimicrococcus                     | 0.1        | 0.3                 | 100.0             | 0.0            | 0.2            |
| Methanocorpusculaceae<br>_unclassified | 0.0        | 0.0                 | 100.0             | 0.0            | 0.0            |
| <b>OA/Co</b>                           |            |                     |                   |                |                |
| <b>Taxon</b>                           | <b>Avg</b> | <b>Contrib. (%)</b> | <b>Cumul. (%)</b> | <b>Mean OA</b> | <b>Mean Co</b> |
| Methanobrevibacter                     | 16.5       | <b>49.0</b>         | 49.0              | 98.8           | 66.3           |
| Methanocorpusculum                     | 16.5       | <b>49.0</b>         | 98.0              | 0.0            | 32.9           |
| Methanosphaera                         | 0.5        | 1.4                 | 99.3              | 1.2            | 0.3            |
| Methanimicrococcus                     | 0.2        | 0.6                 | 99.9              | 0.0            | 0.4            |
| Methanocorpusculaceae<br>_unclassified | 0.0        | 0.0                 | 100.0             | 0.0            | 0.0            |

| Je/Ce                                  |      |              |            |         |         |
|----------------------------------------|------|--------------|------------|---------|---------|
| Taxon                                  | Avg  | Contrib. (%) | Cumul. (%) | Mean Je | Mean Ce |
| Methanobrevibacter                     | 16.3 | <b>49.5</b>  | 49.5       | 99.3    | 66.9    |
| Methanocorpusculum                     | 16.3 | <b>49.4</b>  | 98.9       | 0.0     | 32.6    |
| Methanosphaera                         | 0.2  | 0.7          | 99.7       | 0.7     | 0.3     |
| Methanimicrococcus                     | 0.1  | 0.3          | 100.0      | 0.0     | 0.2     |
| Methanocorpusculaceae<br>_unclassified | 0.0  | 0.0          | 100.0      | 0.0     | 0.0     |

  

| Je/Co                                  |      |              |            |         |         |
|----------------------------------------|------|--------------|------------|---------|---------|
| Taxon                                  | Avg  | Contrib. (%) | Cumul. (%) | Mean Je | Mean Co |
| Methanobrevibacter                     | 16.6 | <b>49.5</b>  | 49.5       | 99.3    | 66.3    |
| Methanocorpusculum                     | 16.5 | <b>49.1</b>  | 98.6       | 0.0     | 32.9    |
| Methanosphaera                         | 0.2  | 0.7          | 99.3       | 0.7     | 0.3     |
| Methanimicrococcus                     | 0.2  | 0.6          | 99.9       | 0.0     | 0.4     |
| Methanocorpusculaceae<br>_unclassified | 0.0  | 0.0          | 100.0      | 0.0     | 0.0     |
| Methanobacteriaceae<br>_unclassified   | 0.0  | 0.0          | 100.0      | 0.0     | 0.0     |

Avg: average dissimilarity; Contrib. (%): percent contributed; Cumul. (%): cumulative percentage; Ru: rumen; OA: omasum + abomasum; Je: jejunum; Ce: cecum; Co: colon. Bold indicates the relative percentage of the archaeal genera that contributed most to the observed dissimilarity between samples.
